# Supplementary material for: Distal Colon Motor Dysfunction in Mice with Chronic Kidney Disease: Putative Role of Uremic Toxins
Source: MDPI journal article supplement (doi:10.3390/toxins10050204), 2018-05-16
Supplement: s1 [file s1]

## Supplementary Materials: Distal Colon Motor Dysfunction in Mice with Chronic Kidney Disease: Putative Role of Uremic Toxins

Elsa Hoibian, Nans Florens, Laetitia Koppe, Hubert Vidal and Christophe O. Soulage

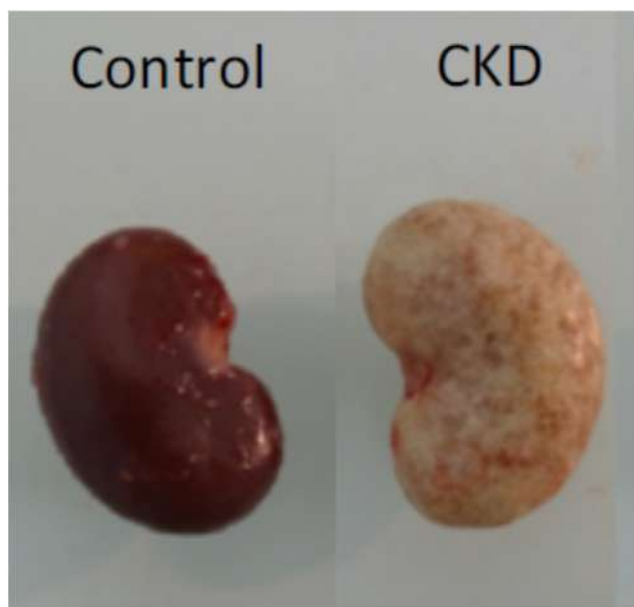

**Figure S1.** Macroscopic view of the kidney of control and CKD mice. Mice were fed for 3 weeks with a diet containing 0.25% (w/w) adenin to induce kidney failure. Note the fibrotic aspect of the kidney from CKD mice.
